# Supplementary material
Source: Springer Nature journal article supplement (https://www.springermedizin.de/resource/supplementary/12985_2010_1017_MOESM8_ESM.pdf/9608956)

**A**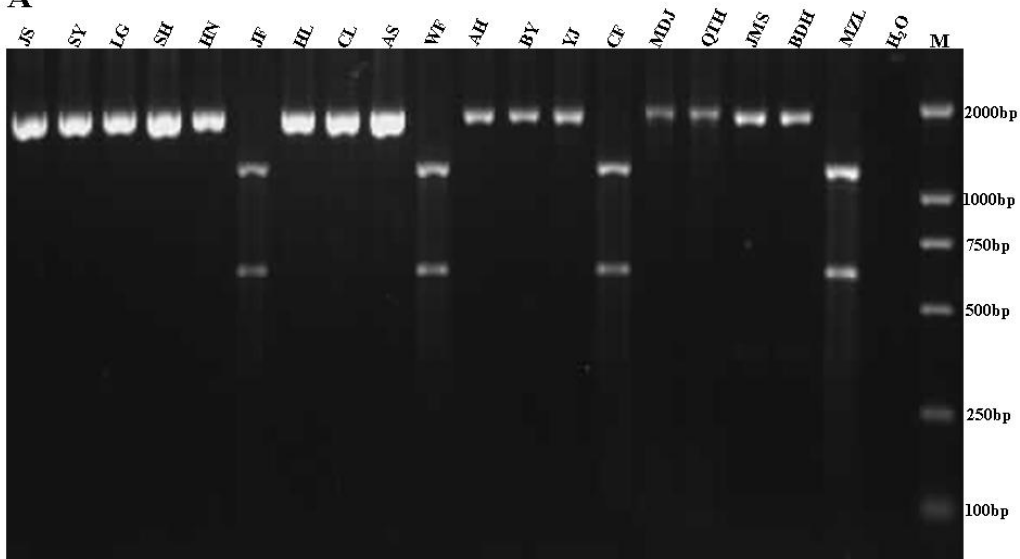**B**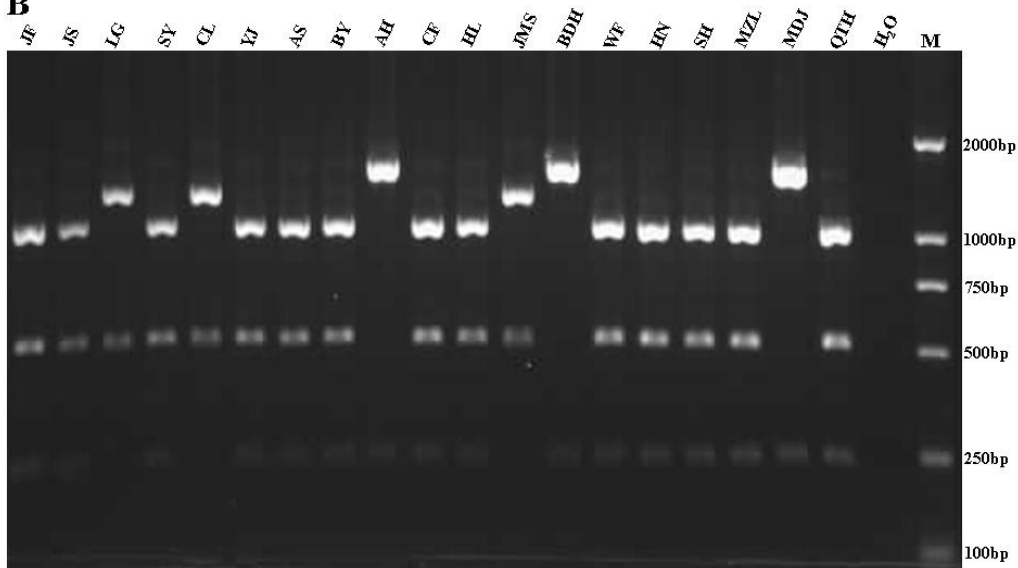

Supplement: MOESM8 [file 9608956]
